# Supplementary material for: Electrochemotherapy Causes Caspase-Independent Necrotic-Like Death in Pancreatic Cancer Cells
Source: Cancers (Basel). 2019 Aug 14;11(8):1177. doi: 10.3390/cancers11081177 (PMC6721532; doi:10.3390/cancers11081177)
Supplement: Supplementary file 1 [file cancers-11-01177-s001.zip]

Archive with 7 entries (7 files):
- SD 1.pdf
- SD 2.pdf
- SD 3.pdf
- SD 4A.pdf
- SD 4B.pdf
- SD 5.pdf
- Supplementary Figure Legends.docx
